# Supplementary material for: Uranium Transport in F-Cl-Bearing Fluids and Hydrothermal Upgrading of U-Cu Ores in IOCG Deposits
Source: Hindawi journal article supplement (doi:10.1155/2018/6835346), 2018-08-28
Supplement: f1 [file 6835346.f1.docx]

*Supplementary material for*

**Uranium transport in F-Cl-bearing fluids and hydrothermal upgrading of U-Cu ores in IOCG deposits**

Xing, Yanlu1, Mei, Yuan1,2, Etschmann, Barbara1, Liu, Weihua2,and Brugger, Joël1,*

1. School of Earth, Atmosphere and the Environment, Monash University, Clayton, VIC 3800, Australia

2. CSIRO Mineral Resources Flagship, Clayton, VIC 3168, Australia

* Corresponding author: [joel.brugger@monash.edu](mailto:joel.brugger@monash.edu)

**Table S1.** Uranium minerals and aqueous U species used in the modelling

|  | **Species** | **Equation of State** | **Data source** |
| --- | --- | --- | --- |
|  | Minerals | | |
| 1 | Uraninite |  | Guillaumont et al., 2003 |
| 2 | UO3(crys.) |  | Guillaumont et al., 2003 |
| 3 | U3O8(cyrs.) |  | Guillaumont et al., 2003 |
| 4 | U4O9(crys.) |  | Guillaumont et al., 2003 |
| 5 | UO2F2 (cr) |  | Grenthe et al., 1992 |
| 6 | Soddyite |  | Shvareva, 2012 |
| 7 | Coffinite |  | Szenknect et al., 2016; Bastrakov et al., 2010 |
|  | Aqueous species | | |
| 1 | U3+ | Revised HKF | Shock et al., 1997 |
| 2 | UO2- | Revised HKF | Shock et al., 1997 |
| 3 | UO2+ | Revised HKF | Shock et al., 1997 |
| 4 | UO22+ | Revised HKF | Shock et al., 1997 |
| 5 | UOH2+ | Revised HKF | Shock et al., 1997 |
| 6 | U4+ | Revised HKF | Shock et al., 1997 |
| 7 | UO+ | Revised HKF | Shock et al., 1997 |
| 8 | HUO2 (aq) | Revised HKF | Shock et al., 1997 |
| 9 | UO2 (aq) | Revised HKF | Guillaumont et al., 2003 |
| 10 | U(OH)3+ | Revised HKF | Shock et al., 1997 |
| 11 | HUO2+ | Revised HKF | Shock et al., 1997 |
| 12 | UO2OH (aq) | Revised HKF | Shock et al., 1997 |
| 13 | UO2OH+ | B.Ryzhenko model | Zanonato et al., 2004 |
| 14 | UO2(OH)2 (aq) | Revised HKF | Bastrakov et al., 2010 |
| 15 | UO2(OH)3- | Revised HKF | Shock et al., 1997 |
| 16 | UO2(OH)42- | Revised HKF | Shock et al., 1997 |
| 17 | (UO2)2(OH)22+ | B.Ryzhenko model | Plyasunov and Grenthe, 1994 |
| 18 | (UO2)2(OH)3+ | B.Ryzhenko model | Plyasunov and Grenthe, 1994 |
| 19 | (UO2)3(OH)42+ | B.Ryzhenko model | Plyasunov and Grenthe, 1994 |
| 20 | (UO2)3(OH)5+ | B.Ryzhenko model | Plyasunov and Grenthe, 1994 |
| 21 | (UO2)3(OH)7- | B.Ryzhenko model | Plyasunov and Grenthe, 1994 |
| 22 | (UO2)4(OH)7+ | B.Ryzhenko model | Plyasunov and Grenthe, 1994 |
| 23 | UF3+ | B.Ryzhenko model | Guillaumont et al., 2003 |
| 24 | UF22+ | B.Ryzhenko model | Guillaumont et al., 2003 |
| 25 | UF3+ | B.Ryzhenko model | Guillaumont et al., 2003 |
| 26 | UF4 (aq) | B.Ryzhenko model | Guillaumont et al., 2003 |
| 27 | UF5- | B.Ryzhenko model | Bastrakov et al., 2010 |
| 28 | UF62- | B.Ryzhenko model | Bastrakov et al., 2010 |
| 29 | UO2F+ | B.Ryzhenko model | This study |
| 30 | UO2F2 (aq) | B.Ryzhenko model | This study |
| 31 | UO2F3- | B.Ryzhenko model | Guillaumont et al., 2003 |
| 32 | UO2F42- | B.Ryzhenko model | Guillaumont et al., 2003 |
| 33 | UCl3+ | B.Ryzhenko model | This study |
| 34 | UCl22+ | B.Ryzhenko model | This study |
| 35 | UO2Cl (aq) | B.Ryzhenko model | Barsukov and Borisov, 2003 |
| 36 | UO2Cl2- | B.Ryzhenko model | Barsukov and Borisov, 2003 |
| 37 | UO2Cl+ | B.Ryzhenko model | Migdisov, 2017 |
| 38 | UO2Cl2 (aq) | B.Ryzhenko model | Migdisov 2017 |
| 39 | UO2H2PO4+ | B.Ryzhenko model | Guillaumont et al., 2003 |
| 40 | UO2(H2PO4)2 (aq) | B.Ryzhenko model | Barsukov and Borisov, 2003 |
| 41 | UO2(H2PO4)3- | B.Ryzhenko model | Barsukov and Borisov, 2003 |
| 42 | UO2HPO4 (aq) | B.Ryzhenko model | Barsukov and Borisov, 2003 |
| 43 | UO2(HPO4)22- | B.Ryzhenko model | Barsukov and Borisov, 2003 |
| 44 | UHPO42+ | B.Ryzhenko model | Barsukov and Borisov, 2003 |
| 45 | U(HPO4)2 (aq) | B.Ryzhenko model | Barsukov and Borisov, 2003 |
| 46 | U(HPO4)32- | B.Ryzhenko model | Barsukov and Borisov, 2003 |
| 47 | U(HPO4)44- | B.Ryzhenko model | Barsukov and Borisov, 2003 |
| 48 | USO42+ | B.Ryzhenko model | Guillaumont et al., 2003 |
| 49 | U(SO4)2 (aq) | B.Ryzhenko model | Guillaumont et al., 2003 |
| 50 | UO2SO4 (aq) | B.Ryzhenko model | Gullaumont et al., 2003 |
| 51 | UO2(SO4)22- | B.Ryzhenko model | Gullaumont et al., 2003 |

**Table S2.** Digital copy of the thermodynamic data used in the modelling in HCh text export format. For minerals, units are: G(298): [J/mol], S(298): [Jmol-1K-1], V(298): [J/bar]. For the modified HKF model of aqueous species, units are: G(298): [cal/mol], H(298): [cal/mol], S(298): [calmol-1K-1].

Basic species: U+++

G(298): -113550

H(298): -116900

S(298): -46.100

a1*E1: -2.8438

a2*E-2: -14.7220

a3: 11.5280

a4*E-4: -2.1703

c1: 5.7945

c2*E-4: -10.4492

w*E-5: 2.2752

z: 3

Basic species: UO2-

G(298): -183700

H(298): -193600

S(298): 43.300

a1*E1: 5.1728

a2*E-2: 4.8473

a3: 3.8491

a4*E-4: -2.9793

c1: -57.3622

c2*E-4: -28.2322

w*E-5: 0.9733

z: -1

Basic species: UO2+

G(298): -229690

H(298): -245000

S(298): -600.000

a1*E1: 3.3767

a2*E-2: 0.4614

a3: 5.5725

a4*E-4: -2.7980

c1: -0.9002

c2*E-4: -7.5363

w*E-5: 0.6388

z: 1

Basic species: U++++

G(298): -126650

H(298): -141300

S(298): -99.600

a1*E1: -4.2836

a2*E-2: -18.2319

a3: 12.8955

a4*E-4: -2.0252

c1: 40.2193

c2*E-4: -2.9938

w*E-5: 3.6835

z: 4

Basic species: UO2++

G(298): -227680

H(298): -243550

S(298): -23.500

a1*E1: 3.0256

a2*E-2: -4.1084

a3: 15.3326

a4*E-4: -2.6091

c1: 21.0700

c2*E-4: 0.4300

w*E-5: 1.4099

z: 2

Basic species: UOH++

G(298): -161800

H(298): -167700

S(298): 1.200

a1*E1: 2.8136

a2*E-2: -0.9087

a3: 6.1004

a4*E-4: -2.7413

c1: -6.8963

c2*E-4: -10.8973

w*E-5: 1.0376

z: 2

Basic species: UO+

G(298): -152900

H(298): -153900

S(298): 17.500

a1*E1: 2.9158

a2*E-2: -0.6648

a3: 6.0168

a4*E-4: -2.7514

c1: -38.0715

c2*E-4: -19.3305

w*E-5: 0.2873

z: 1

Basic species: HUO2 (aq)

G(298): -198000

H(298): -205100

S(298): 52.900

a1*E1: 5.1622

a2*E-2: 4.8252

a3: 3.8489

a4*E-4: -2.9784

c1: -78.8543

c2*E-4: -32.4895

w*E-5: -0.0300

z: 0

Basic species: U(OH)+++

G(298): -182600

H(298): -198400

S(298): -47.800

a1*E1: 2.1611

a2*E-2: -2.5064

a3: 6.7390

a4*E-4: -2.6753

c1: 37.5484

c2*E-4: 0.4894

w*E-5: 2.3058

z: 3

Complex: UO2OH+

Species: 2

1 UO2++

1 OH-

pK(298): 8.616

A(zz/a): 1.045

B(zz/a): 181.1

Complex: (UO2)2(OH)2++

Species: 2

2 UO2++

2 OH-

pK(298): 22.380

A(zz/a): 2.111

B(zz/a): 0.00

Basic species: UO3 (aq)

G(298): -267767

H(298): 0

S(298): -12.90

a1*E1: 3.7801

a2*E-2: 1.4512

a3: 5.1736

a4*E-4: -2.8389

c1: 5.4213

c2*E-4: -3.1975

w*E-5: -0.0300

z: 0

Complex: UO2SO4 (aq)

Species: 2

1 UO2++

1 SO4--

pK(298): 3.150

A(zz/a): 1.270

B(zz/a): 0.00

Complex: UO2(SO4)2--

Species: 2

1 UO2++

2 SO4--

pK(298): 4.140

A(zz/a): 1.990

B(zz/a): 0.00

Complex: UO2Cl+

Species: 2

1 UO2++

1 Cl-

pK(298): 0.017

A(zz/a): 0.792

B(zz/a): -46.80

Pure phase: Uraninite

G(298): -1031830

S(298): 77.030

V(298): 2.4620

Equations: 1

T(K): 600.0

dVdT: 0.0000

dV: 0.0000

dH: 999999999

Max.terms: 3

0: 6.277400E+01

1: 3.174000E-02

-2: 7.693000E+05

Formula: UO2

Pure phase: UO3 (cr)

G(298): -1145739

S(298): 96.110

V(298): 3.5560

Equations: 1

T(K): 1273.2

dVdT: 0.0000

dV: 0.0000

dH: 999999999

Max.terms: 3

0: 8.810300E+01

1: 1.664000E-02

-2: -1.012800E+06

Formula: UO3

Pure phase: U3O8 (cr)

G(298): -3369471

S(298): 282.540

V(298): 0.0000

Equations: 1

T(K): 1273.2

dVdT: 0.0000

dV: 0.0000

dH: 999999999

Max.terms: 3

0: 2.618280E+02

1: 6.648000E-02

-2: -3.732000E+06

Formula: U3O8

Pure phase: U4O9 (cr)

G(298): -4276332

S(298): 341.600

V(298): 0.0000

Equations: 1

T(K): 1273.2

dVdT: 0.0000

dV: 0.0000

dH: 999999999

Max.terms: 3

0: 3.163560E+02

1: 5.460000E-02

-2: -4.152000E+06

Formula: U4O9

Complex: UF+++

Species: 2

1 F-

1 U++++

pK(298): 9.420

A(zz/a): 1.628

B(zz/a): 0.00

Complex: UF2++

Species: 2

1 U++++

2 F-

pK(298): 16.560

A(zz/a): 3.082

B(zz/a): 0.00

Complex: UF3+

Species: 2

1 U++++

3 F-

pK(298): 21.890

A(zz/a): 4.247

B(zz/a): 0.00

Complex: UF4 (aq)

Species: 2

1 U++++

4 F-

pK(298): 26.340

A(zz/a): 4.804

B(zz/a): 0.00

Complex: UF5-

Species: 2

1 U++++

5 F-

pK(298): 25.000

A(zz/a): 6.211

B(zz/a): 0.00

Complex: UF6--

Species: 2

1 U++++

6 F-

pK(298): 27.850

A(zz/a): 6.316

B(zz/a): 0.00

Pure phase: UO2F2(cr)

G(298): -1557322

S(298): 135.560

V(298): 0.0000

Equations: 1

T(K): 1273.2

dVdT: 0.0000

dV: 0.0000

dH: 999999999

Max.terms: 3

0: 1.062380E+02

1: 2.832600E-02

-2: -1.020800E+06

Formula: UO2F2

Pure phase: Soddyite

G(298): -1826100

S(298): -1338.400

V(298): 7.2200

Equations: 1

T(K): 1273.2

dVdT: 0.0000

dV: 0.0000

dH: 999999999

Max.terms: 5

0: 1.121430E+02

1: 1.678310E+02

-2: -8.845000E-01

-.5: 0.000000E+00

2: -7.265950E+01

Formula: UO2(SiO4)0.5H2O

Basic species: HUO2+

G(298): -233200

H(298): -254800

S(298): -11.400

a1*E1: 3.2291

a2*E-2: 0.1055

a3: 5.7039

a4*E-4: -2.7833

c1: 14.0517

c2*E-4: -2.6271

w*E-5: 0.7287

z: 1

Basic species: UO2 (aq)

G(298): -226345

H(298): 0

S(298): -23.880

a1*E1: 2.5926

a2*E-2: -1.4510

a3: 6.3204

a4*E-4: -2.7190

c1: 14.5000

c2*E-4: -0.3906

w*E-5: -0.0300

z: 0

Complex: UCl+++

Species: 2

1 U++++

1 Cl-

pK(298): 1.720

A(zz/a): 1.628

B(zz/a): 0.00

Complex: UCl2++

Species: 2

1 U++++

2 Cl-

pK(298): 1.220

A(zz/a): 3.082

B(zz/a): 0.00

Complex: UHPO4++

Species: 2

1 U++++

1 HPO4--

pK(298): 12.690

A(zz/a): 3.590

B(zz/a): 0.00

Complex: U(HPO4)2 (aq)

Species: 2

1 U++++

2 HPO4--

pK(298): 21.970

A(zz/a): 5.952

B(zz/a): 0.00

Complex: U(HPO4)3--

Species: 2

1 U++++

3 HPO4--

pK(298): 31.000

A(zz/a): 6.846

B(zz/a): 0.00

Complex: U(HPO4)4----

Species: 2

1 U++++

4 HPO4--

pK(298): 38.850

A(zz/a): 7.270

B(zz/a): 0.00

Complex: USO4++

Species: 2

1 U++++

1 SO4--

pK(298): 6.580

A(zz/a): 1.541

B(zz/a): 0.00

Complex: U(SO4)2 (aq)

Species: 2

1 U++++

2 SO4--

pK(298): 10.510

A(zz/a): 3.135

B(zz/a): 0.00

Basic species: UO2OH (aq)

G(298): -261600

H(298): -295900

S(298): -13.900

a1*E1: 3.7390

a2*E-2: 1.3467

a3: 5.2242

a4*E-4: -2.8346

c1: 20.4246

c2*E-4: 2.0172

w*E-5: -0.0300

z: 0

Complex: UO2Cl (aq)

Species: 2

1 UO2+

1 Cl-

pK(298): 0.190

A(zz/a): -0.550

B(zz/a): 0.00

Complex: UO2Cl2-

Species: 2

1 UO2+

2 Cl-

pK(298): 0.020

A(zz/a): -1.138

B(zz/a): 0.00

Basic species: HUO4-

G(298): -314800

H(298): -362900

S(298): -20.100

a1*E1: 4.9364

a2*E-2: 4.2748

a3: 4.0637

a4*E-4: -2.9556

c1: 36.9351

c2*E-4: 1.4672

w*E-5: 1.9339

z: -1

Basic species: UO4--

G(298): -296000

H(298): -346200

S(298): -27.100

a1*E1: 5.0964

a2*E-2: 4.6606

a3: 3.9223

a4*E-4: -2.9716

c1: 13.5130

c2*E-4: -12.0788

w*E-5: 3.6219

z: -2

Complex: (UO2)2OH+++

Species: 2

2 UO2++

1 OH-

pK(298): 11.300

A(zz/a): 0.968

B(zz/a): 0.00

Complex: (UO2)3(OH)4++

Species: 2

4 OH-

3 UO2++

pK(298): 44.100

A(zz/a): 4.199

B(zz/a): 0.00

Complex: (UO2)3(OH)5+

Species: 2

3 UO2++

5 OH-

pK(298): 54.450

A(zz/a): 5.353

B(zz/a): 0.00

Complex: (UO2)3(OH)7-

Species: 2

3 UO2++

7 OH-

pK(298): 67.000

A(zz/a): 6.780

B(zz/a): 0.00

Complex: (UO2)4(OH)7+

Species: 2

4 UO2++

7 OH-

pK(298): 76.100

A(zz/a): 7.440

B(zz/a): 0.00

Complex: UO2F+

Species: 2

1 UO2++

1 F-

pK(298): 5.144

A(zz/a): 0.700

B(zz/a): 0.00

Complex: UO2F2

Species: 2

1 UO2++

2 F-

pK(298): 8.830

A(zz/a): 2.673

B(zz/a): -884.6

Complex: UO2F3-

Species: 2

1 UO2++

3 F-

pK(298): 10.900

A(zz/a): 2.184

B(zz/a): 0.00

Complex: UO2F4--

Species: 2

1 UO2++

4 F-

pK(298): 11.840

A(zz/a): 2.298

B(zz/a): 0.00

Complex: UO2Cl2 (aq)

Species: 2

1 UO2++

2 Cl-

pK(298): 0.396

A(zz/a): 2.673

B(zz/a): -884.6

Complex: UO2H2PO4+

Species: 2

1 UO2++

1 H2PO4-

pK(298): 3.040

A(zz/a): 0.856

B(zz/a): 0.00

Complex: UO2(H2PO4)2 (aq)

Species: 2

1 UO2++

2 H2PO4-

pK(298): 5.400

A(zz/a): 0.188

B(zz/a): 0.00

Complex: UO2(H2PO4)3-

Species: 2

1 UO2++

3 H2PO4-

pK(298): 7.210

A(zz/a): -0.164

B(zz/a): 0.00

Complex: UO2HPO4 (aq)

Species: 2

1 UO2++

1 HPO4--

pK(298): 8.080

A(zz/a): 2.463

B(zz/a): 0.00

Complex: UO2(HPO4)2--

Species: 2

1 UO2++

2 HPO4--

pK(298): 18.880

A(zz/a): 3.587

B(zz/a): 0.00

Pure phase: Coffinite

G(298): -1867600

S(298): 136.000

V(298): 6.1520

Equations: 1

T(K): 1273.2

dVdT: 0.0000

dV: 0.0000

dH: 999999999

Max.terms: 4

0: 1.882450E+02

1: 3.191000E-03

-2: -1.796300E+06

-.5: -1.085000E+03

Formula: USiO4

**References**

Barsukov, V. L., and M. V. Borisov, 2003, Models of uranium dissolution in natural waters of various Compositions: Geochemistry International, v. 41, p. 38-63.

Bastrakov, E., S. Jaireth, and T. Mernagh, 2010, Solubility of Uranium in hydrothermal fludis at 25º to 300ºC: Geoscience Australia, v. 29.

Grenthe, I., J. Fuger, R. Konings, R. Lemire, A. Muller, C. Nguyen-Trung, and H. Wanner, 1992, Chemical thermodynamics of uranium, p. 714.

Guillaumont, R., T. Fanghanel, V. Neck, J. Fuger, D. Palmer, I. Grenthe, and M. Rand, 2003, Update on the Chemical Thermodynamics of Uranium, Neptunium, Plutonium, Americium and Technetium.

Migdisov, A., H. Boukhalfa, A. Timofeev, W. Runde, R. Roback, and A. E. Williams-Jones, 2017, A spectroscopic study of uranyl speciation in chloride-bearing solutions at temperatures up to 250 °C: Geochimica et Cosmochimica Acta, v. In press.

Plyasonov, A. V., and I. Grenthe, 1994, The temperature dependence of stability constants for the formation of polynuclear cationic complexes: Geochimica et Cosmochimica Acta, v. 58, p. 3561-3582.

Shock, E. L., D. Sassani, M. Willis, and D. A. Sverjensky, 1997, Inorganic species in geologic fluids: Correlations among standard molal thermodynamic properties of aqueous ions and hydroxide complexes: Geochimica et Cosmochimica Acta, v. 61, p. 907-950.

Shvareva, T. Y., J. B. Fein, and A. Navrotsky, 2012, Thermodynamic Properties of Uranyl Minerals: Constraints from Calorimetry and Solubility Measurements: Industrial & Engineering Chemistry Research, v. 51, p. 607-613.

Szenknect, S., A. Mesbah, T. Cordara, N. Clavier, H.-P. Brau, X. L. Goff, C. Poinssot, R. C. Ewing, and N. Dacheux, 2016, First experimental determination of the solubility constant of coffinite: Geochimica et Cosmochimica Acta.

Zanonato, P., P. D. Bernardo, A. Bismondo, G. Liu, X. Chen, and L. Rao, 2004, Hydrolysis of Uranium(VI) at Variable Temperatures: Journal of the American Chemical Society, v. 126, p. 5515-5522.
